# Supplementary material
Source: publisher figshare collection journal article supplement (https://gsapubs.figshare.com/ndownloader/files/39640033)
Supplement: Supplementary file 1 [file 39640033]

## Sheet: Table S1
Table S1 Representative electron microprobe analyses of garnet profile in eclogite LH3-4
Sample.no	LH3-4	LH3-4	LH3-4	LH3-4	LH3-4	LH3-4	LH3-4	LH3-4	LH3-4	LH3-4	LH3-4	LH3-4	LH3-4	LH3-4	LH3-4	LH3-4	LH3-4	LH3-4	LH3-4	LH3-4	LH3-4	LH3-4	LH3-4	LH3-4	LH3-4	LH3-4	LH3-4	LH3-4	LH3-4	LH3-4	LH3-4	LH3-4	LH3-4	LH3-4	LH3-4	LH3-4	LH3-4	LH3-4	LH3-4	LH3-4	LH3-4	LH3-4
Mineral	g1	g2	g3	g4	g5	g6	g7	g8	g9	g10	g11	g12	g13	g14	g15	g16	g17	g18	g19	g20	g21	g22	g23	g24	g25	g26	g27	g28	g29	g30	g31	g32	g33	g34	g35	g36	g37	g38	g39	g40	g41	g42
SiO2	39.02	38.63	38.78	38.56	38.44	38.46	38.4	38.14	38.34	38.01	37.81	37.92	37.89	37.71	37.92	37.8	37.94	37.98	37.59	37.68	37.69	37.76	37.41	37.5	37.63	37.77	37.76	37.69	37.76	38.17	37.88	38.03	37.87	37.92	38.24	38.08	38.26	38.28	38.34	38.62	38.52	38.77
TiO2	0.05	0.06	0.14	0.06	0.04	0.11	0.08	0.03	0.06	0.16	0.06	0.13	0.08	0.15	0.19	0.11	0.12	0.2	0.09	0.13	0.1	0.11	0.12	0.22	0.09	0.07	0.14	0.09	0.08	0.13	0.14	0.1	0.14	0.12	0.1	0.05	0.01	0.05	0.06	0.09	0.03	0.06
Al2O3	21.56	21.48	21.07	21.1	21.16	21.25	20.99	21.25	21.25	21.18	20.83	20.77	20.68	20.84	20.84	20.64	20.63	20.52	20.78	20.72	20.68	20.78	20.65	20.66	20.83	20.71	20.79	20.83	20.71	20.79	20.83	20.8	20.94	20.85	20.93	21.16	21.19	21.15	21.16	21.29	21.13	21.23
Cr2O3	0	0	0	0	0	0	0	0	0	0	0	0	0	0	0	0	0	0	0	0	0	0	0	0	0	0	0	0	0	0	0	0	0	0	0	0	0	0	0	0	0	0
Fe2O3	0	0	0	0	0	0	0	0.01	0	0	0.08	0.1	0	0	0	0.07	0	0	0	0.01	0.1	0.03	0.2	0.08	0.59	0	0.03	0.36	0.34	0	0	0.06	0	0	0	0.37	0.39	0	0	0	0	0
FeO	24.52	24.75	24.62	24.17	24.14	24.32	24.25	24.57	24.87	27.12	27.27	27.59	27.58	26.96	27.03	26.36	26.03	25.67	24.69	24.83	24.51	24.71	24.43	24.71	24.94	25.9	26.68	26.41	26.15	27.33	27.02	27	26.86	27.13	26.69	23.99	24.34	24.6	23.59	24.43	24.25	24.36
MnO	0.14	0.17	0.23	0.36	0.47	0.49	0.77	0.98	1.16	0.95	1	1.28	1.4	1.52	1.5	2.23	2.47	2.84	3.34	3.85	4.17	4.08	3.9	3.56	3.1	2.4	2.04	2	1.66	1.46	1.18	1.1	1.01	1.02	0.97	1.13	1.01	0.55	0.64	0.33	0.29	0.35
MgO	4.72	4.13	3.91	3.49	3.23	2.87	2.71	2.66	2.48	2.58	2.35	2.22	2.04	1.86	1.95	1.66	1.5	1.35	1.32	1.27	1.19	1.21	1.2	1.17	1.32	1.44	1.58	1.67	1.8	2.13	2.3	2.39	2.59	2.79	2.84	2.61	2.78	2.88	3.15	3.44	3.76	3.99
CaO	10.16	10.5	11.13	11.37	11.91	11.97	12.01	11.87	11.67	9.91	9.81	9.71	9.7	10.16	10.35	10.54	10.84	10.79	11.17	10.97	11.08	11.06	11.14	11.27	11.21	10.79	10.62	10.5	11.06	9.8	9.94	10.06	9.81	9.36	9.73	12.22	11.97	11.86	12.32	11.84	11.47	10.57
Na2O	0.04	0.03	0.04	0	0.02	0.02	0	0.03	0.02	0.01	0.05	0.04	0.03	0.02	0.02	0.05	0.03	0.04	0.03	0.03	0.02	0.02	0.01	0.04	0.06	0.03	0.02	0.06	0	0.01	0.02	0.06	0.04	0.04	0.02	0.03	0.02	0.02	0.01	0.02	0.02	0.02
K2O	0	0	0	0.02	0	0	0	0	0.01	0	0	0	0	0.01	0.01	0	0	0	0	0	0	0	0	0.01	0	0	0	0	0	0	0.01	0.01	0.01	0.01	0	0	0	0.01	0	0	0	0
Totals	100.21	99.75	99.93	99.13	99.41	99.5	99.21	99.54	99.85	99.92	99.26	99.75	99.4	99.24	99.81	99.45	99.56	99.38	99.01	99.49	99.55	99.74	99.06	99.2	99.76	99.13	99.67	99.61	99.56	99.82	99.32	99.6	99.29	99.23	99.52	99.64	99.97	99.41	99.26	100.07	99.48	99.36
Oxygens	12	12	12	12	12	12	12	12	12	12	12	12	12	12	12	12	12	12	12	12	12	12	12	12	12	12	12	12	12	12	12	12	12	12	12	12	12	12	12	12	12	12
Si	3.024	3.018	3.029	3.035	3.024	3.025	3.034	3.011	3.02	3.007	3.018	3.018	3.027	3.016	3.016	3.022	3.029	3.038	3.017	3.017	3.017	3.016	3.008	3.01	3.002	3.028	3.014	3.008	3.012	3.032	3.02	3.023	3.015	3.02	3.03	3.004	3.007	3.02	3.02	3.018	3.023	3.038
Ti	0.003	0.003	0.008	0.003	0.003	0.007	0.005	0.002	0.004	0.009	0.004	0.008	0.005	0.009	0.011	0.007	0.007	0.012	0.006	0.008	0.006	0.006	0.007	0.013	0.005	0.004	0.008	0.005	0.005	0.008	0.008	0.006	0.009	0.007	0.006	0.003	0.001	0.003	0.004	0.005	0.002	0.004
Al	1.97	1.978	1.941	1.958	1.962	1.971	1.955	1.978	1.973	1.976	1.96	1.949	1.948	1.965	1.954	1.945	1.942	1.935	1.966	1.956	1.951	1.957	1.958	1.956	1.959	1.957	1.956	1.96	1.947	1.947	1.958	1.949	1.965	1.958	1.954	1.968	1.964	1.967	1.965	1.961	1.955	1.961
Cr	0	0	0	0	0	0	0	0	0	0	0	0	0	0	0	0	0	0	0	0	0	0	0	0	0	0	0	0	0	0	0	0	0	0	0	0	0	0	0	0	0	0
Fe3+	0	0	0	0	0	0	0	0.001	0	0	0.005	0.006	0	0	0	0.004	0	0	0	0	0.006	0.002	0.012	0.005	0.036	0	0.002	0.022	0.02	0	0	0.003	0	0	0	0.022	0.023	0	0	0	0	0
Fe2+	1.589	1.617	1.608	1.591	1.588	1.6	1.602	1.622	1.638	1.794	1.82	1.836	1.843	1.804	1.798	1.763	1.738	1.717	1.657	1.662	1.641	1.651	1.643	1.659	1.664	1.736	1.781	1.763	1.744	1.815	1.802	1.795	1.788	1.807	1.768	1.583	1.6	1.623	1.554	1.597	1.592	1.597
Mn	0.009	0.011	0.015	0.024	0.031	0.032	0.051	0.066	0.077	0.064	0.068	0.086	0.095	0.103	0.101	0.151	0.167	0.192	0.227	0.261	0.283	0.276	0.265	0.242	0.209	0.163	0.138	0.135	0.112	0.098	0.079	0.074	0.068	0.069	0.065	0.075	0.068	0.037	0.043	0.022	0.02	0.023
Mg	0.546	0.481	0.456	0.41	0.379	0.336	0.319	0.312	0.291	0.305	0.28	0.263	0.243	0.222	0.231	0.197	0.178	0.161	0.158	0.151	0.142	0.143	0.144	0.14	0.157	0.172	0.188	0.199	0.214	0.253	0.274	0.283	0.308	0.331	0.335	0.307	0.326	0.339	0.369	0.401	0.44	0.466
Ca	0.844	0.879	0.932	0.959	1.004	1.009	1.017	1.004	0.985	0.84	0.839	0.828	0.831	0.871	0.882	0.903	0.928	0.925	0.96	0.941	0.95	0.946	0.96	0.969	0.958	0.926	0.908	0.898	0.945	0.834	0.849	0.857	0.837	0.798	0.826	1.033	1.008	1.003	1.04	0.991	0.965	0.888
Na	0.006	0.005	0.007	0	0.004	0.003	0	0.004	0.002	0.002	0.007	0.006	0.005	0.003	0.004	0.007	0.004	0.006	0.005	0.004	0.004	0.003	0.002	0.006	0.01	0.005	0.003	0.009	0	0.002	0.003	0.009	0.007	0.007	0.002	0.004	0.004	0.002	0.001	0.003	0.003	0.003
K	0	0	0	0.002	0	0	0	0	0.001	0	0	0	0	0.001	0.001	0	0	0	0	0	0	0	0	0.001	0	0	0	0	0	0	0.001	0.001	0.001	0.001	0	0	0	0.001	0	0	0	0
SUM	7.991	7.992	7.995	7.983	7.994	7.984	7.984	8	7.991	7.997	8	8	7.996	7.994	7.998	8	7.994	7.986	7.997	8	8	8	8	8	8	7.992	8	8	8	7.988	7.995	8	7.998	7.998	7.988	8	8	7.995	7.995	7.998	7.999	7.979
XAlm	0.531794	0.541165	0.534042	0.533177	0.528981	0.537454	0.535965	0.539947	0.547643	0.597403	0.605254	0.609359	0.611886	0.601333	0.596946	0.584937	0.577217	0.573289	0.551965	0.551244	0.544098	0.547414	0.545485	0.551163	0.556894	0.579246	0.590713	0.588648	0.578441	0.605	0.599867	0.596544	0.595801	0.601331	0.590514	0.528019	0.532978	0.54064	0.516966	0.530389	0.527676	0.536987
XGrs	0.282463	0.294177	0.309532	0.321381	0.334444	0.338932	0.340248	0.334221	0.329321	0.27972	0.279016	0.274809	0.275896	0.290333	0.292829	0.299602	0.308203	0.308848	0.319787	0.312106	0.314987	0.31366	0.318725	0.321927	0.320616	0.308976	0.301161	0.299833	0.313433	0.278	0.282623	0.284812	0.278907	0.265557	0.275885	0.344563	0.335776	0.334111	0.345975	0.329127	0.319854	0.298588
XPrp	0.182731	0.160977	0.151445	0.137399	0.126249	0.112865	0.106725	0.103862	0.0972919	0.101565	0.0931161	0.0872884	0.0806773	0.074	0.0766932	0.0653616	0.0591166	0.0537563	0.0526316	0.0500829	0.0470822	0.0474138	0.0478088	0.0465116	0.0525435	0.0573907	0.0623549	0.0664441	0.0709784	0.0843333	0.0912117	0.0940512	0.102632	0.11015	0.11189	0.102402	0.108594	0.112925	0.122754	0.133178	0.14584	0.156691
XSps	0.00301205	0.00368139	0.00498173	0.0080429	0.0103264	0.0107491	0.0170626	0.0219707	0.0257439	0.021312	0.0226139	0.028543	0.0315405	0.0343333	0.0335325	0.0500995	0.0554633	0.0641068	0.0756163	0.0865672	0.0938329	0.0915119	0.0879814	0.0803987	0.0699465	0.0543877	0.0457711	0.0450751	0.0371476	0.0326667	0.0262983	0.0245929	0.0226591	0.0229617	0.0217101	0.0250167	0.0226516	0.0123251	0.0143047	0.00730654	0.0066291	0.00773369
SUM	1	1	1	1	1	1	1	1	1	1	1	1	1	1	1	1	1	1	1	1	1	1	1	1	1	1	1	1	1	1	1	1	1	1	1	1	1	1	1	1	1	1
